# Supplementary material for: Effects of Stokes shift and Purcell enhancement on fluorescence-assisted radiative cooling
Source: Royal Society of Chemistry journal article supplement (doi:10.1039/d2ta02259a), 2022-01-01
Supplement: d2ta02259a1.pdf [file d2ta02259a1.pdf]

## Supporting information

### **Effects of Stokes Shift and Purcell Enhancement in Fluorescence-Assisted Radiative Cooling**

Xue Ma,<sup>a</sup> Yang Fu,<sup>a</sup> Arsenii Portniagin,<sup>a</sup> Ning Yang,<sup>b</sup> Danjun Liu,<sup>a</sup> Andrey L. Rogach,<sup>a</sup> Jian-Guo Dai,<sup>b</sup> and Dangyuan Lei<sup>\*a</sup>

<sup>a</sup> Department of Materials Science and Engineering, The Hong Kong Institute of Clean Energy, and Centre for Functional Photonics (CFP), City University of Hong Kong, 83 Tat Chee Avenue, Kowloon, Hong Kong, 999077, China.

<sup>b</sup> Department of Civil and Environmental Engineering, The Hong Kong Polytechnic University, Hung Hom, Kowloon, Hong Kong, 999077, China.

\*Corresponding author

E-mail: [dangylei@cityu.edu.hk](mailto:dangylei@cityu.edu.hk) (D. Y. Lei)

## **Calculation and simulation**

### **COMSOL simulation of the TiO<sub>2</sub> NP scattering**

Numerical simulations of scattering for TiO<sub>2</sub> NPs were conducted using finite-element-method based software COMSOL. Each TiO<sub>2</sub> NPs in Fig. 2 were reproduced in COMSOL with extracted shapes and sizes from zoom-in SEM image. A glass substrate under the NPs and air above the NPs were added in the simulation structures. Periodic boundary conditions and two ports were applied. The refractive index of TiO<sub>2</sub> and glass used in simulation are given in Fig. S1a and S1b. The reproduced structures for TiO<sub>2</sub> NPs in COMSOL were demonstrated in Fig. S1c.

### **Scattering efficiency of TiO<sub>2</sub> NPs in different dielectric environments**

Moreover, the DFS measurement presents typical scattering characteristic of TiO<sub>2</sub> NPs on a glass substrate. However, after added into the coating, dielectric environment will change and influence the scattering spectra. To evaluate the impact of coating, we calculate the scattering efficiency of a spherical TiO<sub>2</sub> NP at diameter of 212 nm, which is approximately the geometry of the TiO<sub>2</sub> NP in Fig. 2d. As shown in Fig. S2, with surrounding medium of air, the peak scattering exhibits red shift than DFS result due to the low refractive index of air. While with surrounding medium of the coating, blue shift emerges for peak scattering. Therefore, BAM with shorter emission peak will match the scattering peak of TiO<sub>2</sub> NPs in the coating better than S541.

### **Theoretical solar reflectance through Monte Carlo calculations**

To understand the influence of different fillers on solar reflectance of the coatings, we performed Monte Carlo calculations based on random particles distribution.<sup>1-3</sup> TiO<sub>2</sub> NPs were assumed to be spherical to obtain analytical solutions for their scattering parameters. Three coatings (matrix + TiO<sub>2</sub> NPs; matrix + hollow glass spheres; and matrix + TiO<sub>2</sub> NPs + hollow glass spheres) were calculated and analyzed as shown in Fig. S6. The size distributions and volume fractions of the fillers are given in Fig. S3a, Fig. S5b and Table. S2. It can be observed that the solar reflectance of the coatings is benefited mainly from TiO<sub>2</sub> NPs rather than from hollow glass spheres. Hollow glass spheres will not influence the overall solar reflectance since their sizes are too large to produce Mie resonances and thereby manifest low scattering efficiency.

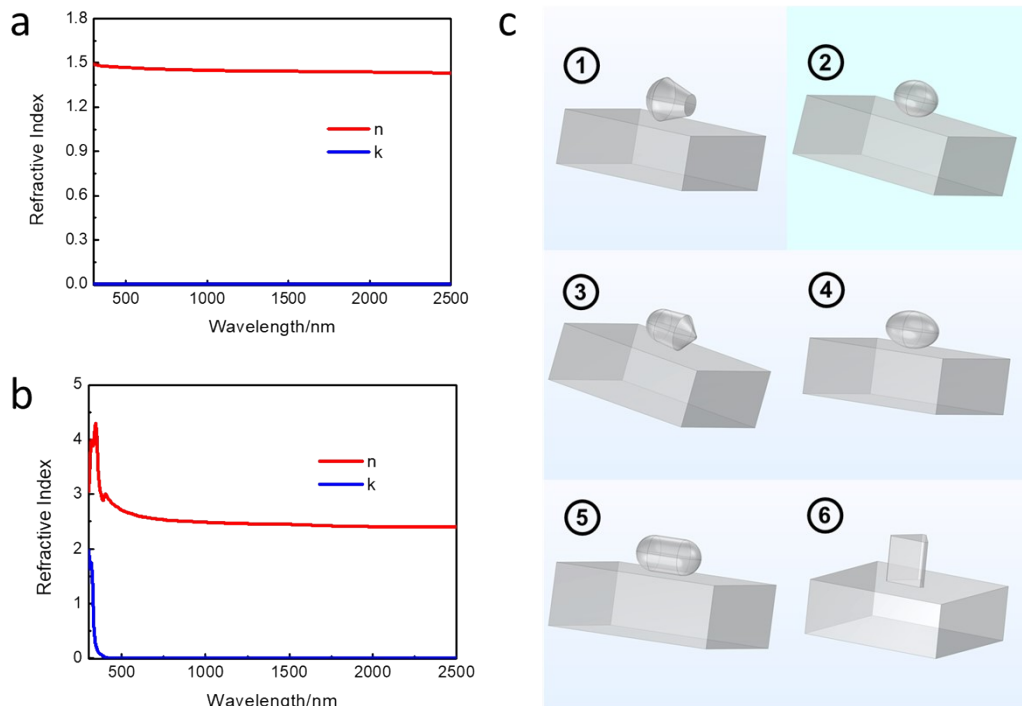

Fig. S1 Refractive index of (a) the glass substrate and (b)  $\text{TiO}_2$  NPs in simulation. (c) Structures on glass substrates built in COMSOL for six single particles in Figure 2.

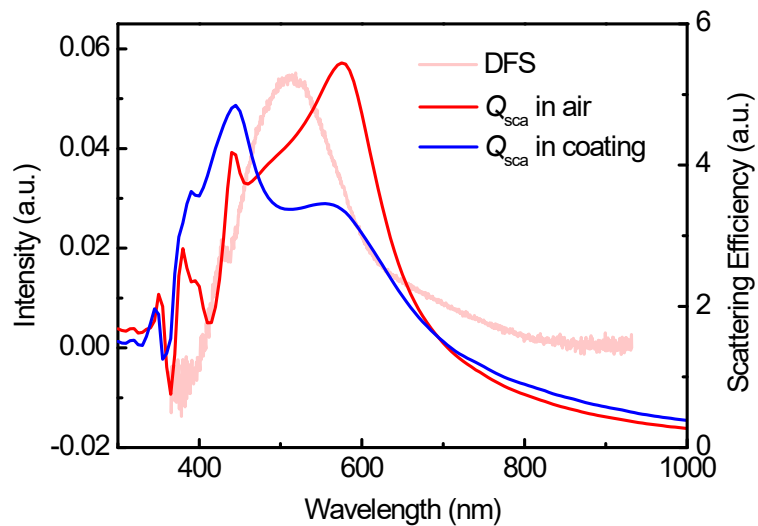

Fig. S2 DFS spectra of  $\text{TiO}_2$  NP in Fig. 2d (pink) and calculated scattering efficiency of spherical  $\text{TiO}_2$  NP at diameter of 212 nm in air (red) and in coating (blue). Blue shift of scattering peaks can be observed for  $\text{TiO}_2$  NP in coating.

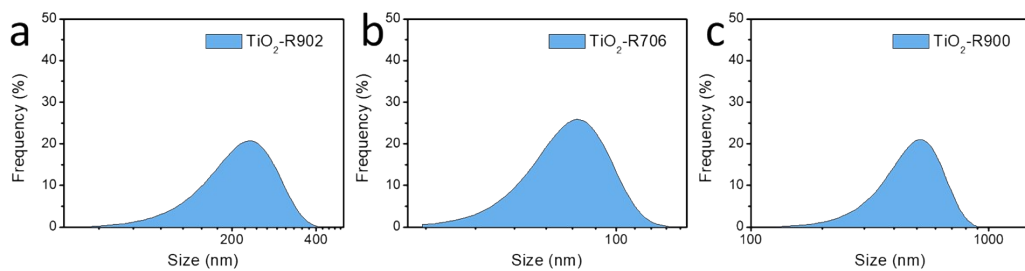

Fig. S3 Size distributions of  $\text{TiO}_2$  powders with model of (a) R902, (b) R706 and (c) R900, respectively. R902 is chosen for cooling coating preparation and DFS measurement in this work.

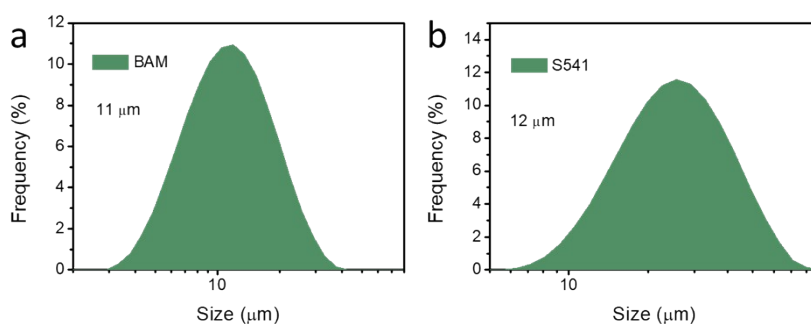

Fig. S4 Size distribution of (a) BAM phosphor and (b) S541 phosphor.

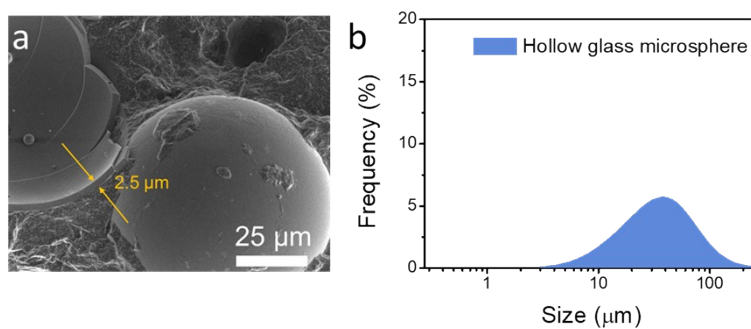

Fig. S5 (a) Cross-section SEM image of a hollow glass microsphere. The shell thickness is fixed at  $\sim 2.5 \mu\text{m}$ . (b) Size (outer diameter) distribution of hollow glass microspheres.

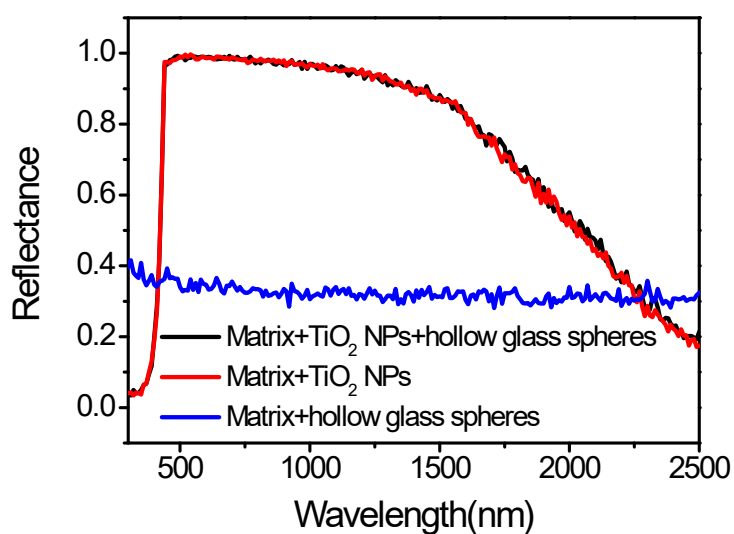

Fig. S6 Theoretical solar reflectance of three different coatings based on Monte Carlo calculations.

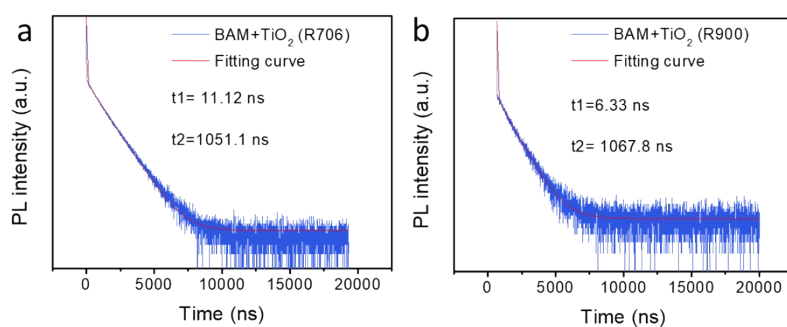

Fig. S7 PL lifetime of BAM phosphor after added in cooling coating based on (a) R706 TiO<sub>2</sub> and (b) R900 TiO<sub>2</sub>, respectively.

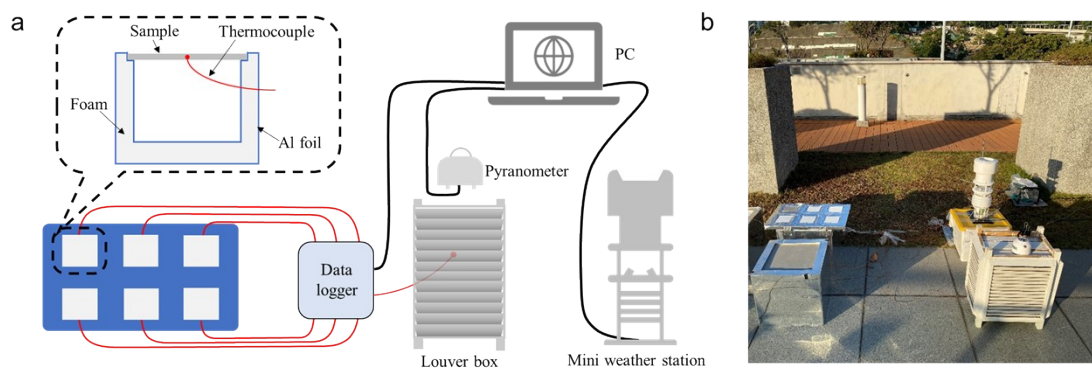

Fig. S8 Schematics and a photograph of the apparatus used for the field test.

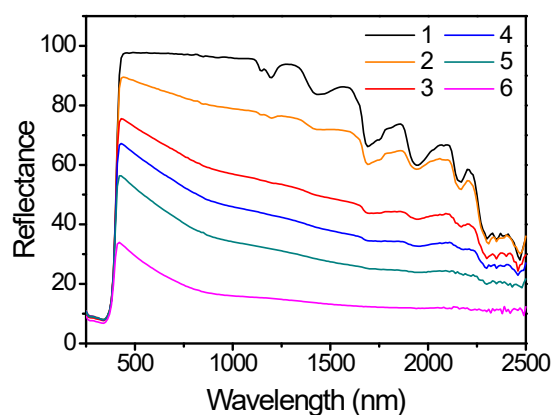

Fig. S9 Reflectance of six reference coatings mixing with different amount of black pigment.

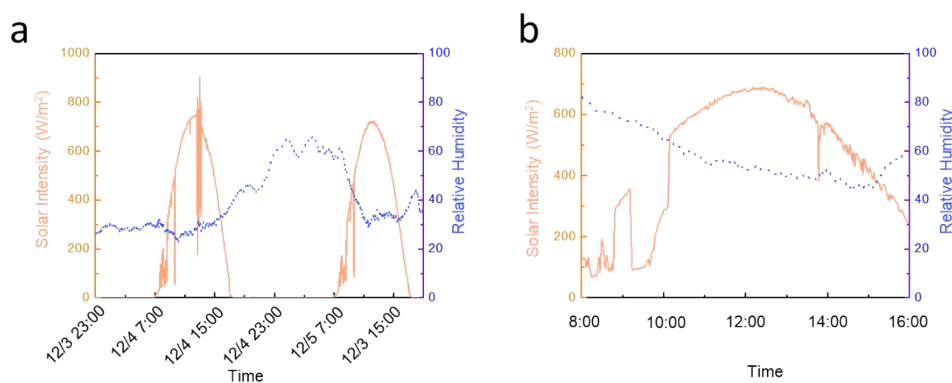

Fig. S10 Solar intensity and relative humidity in field tests for (a) Figure 3a-3b, (b) Figure 3c-3d and Figure 4b. The peak solar intensity ( $\sim 700 \text{ W/m}^2$ ) in (b) was used for cooling power calculation in Figure 4d.

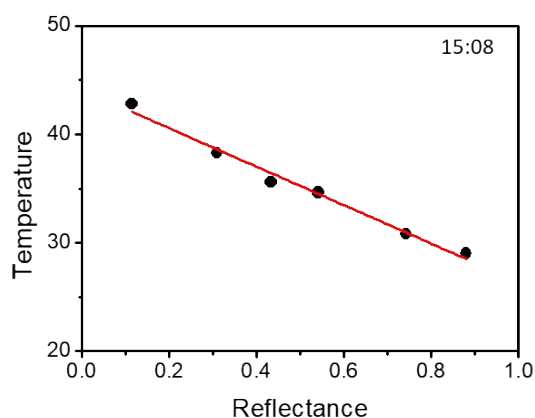

Fig. S11 Temperature fitting of reference samples. The temperature of reference coatings varies nearly linearly with total solar reflectance.

Table S1 Fitted radiative lifetime ( $\tau_2$ ) and non-radiative lifetime ( $\tau_1$ ) for pure phosphors and phosphors in cooling coating.

| Sample             | $\tau_1$ (ns) | $\tau_2$ (ns) |
|--------------------|---------------|---------------|
| Pure BAM           | 387           | 1152          |
| BAM-2g in coating  | 11            | 446           |
| Pure S541          | 264           | 819           |
| S541-2g in coating | 177           | 627           |

Table S2 Densities, weights and volume fractions of main components in fluorescent and white coatings.

| Component                        | Density (g/cm <sup>3</sup> ) | Weight (g) in fluorescent coating | Volume fraction (%) in fluorescent coating | Weight (g) in white coating | Volume fraction (%) in white coating |
|----------------------------------|------------------------------|-----------------------------------|--------------------------------------------|-----------------------------|--------------------------------------|
| Polymer matrix (dried)           | 0.85                         | 10                                | 43.0                                       | 10                          | 44.2                                 |
| TiO <sub>2</sub> NPs             | 4.23                         | 12                                | 10.4                                       | 12                          | 10.7                                 |
| Fluorescent microparticles (BAM) | 3.44                         | 2                                 | 2.8                                        | 0                           | 0                                    |
| Hollow glass spheres             | 0.25                         | 3                                 | 43.8                                       | 3                           | 45.1                                 |

Table S3 Measured solar reflectance for six reference coatings.

| Reference sample No. | UV reflectance | Visible reflectance | Near-infrared reflectance | Solar reflectance |
|----------------------|----------------|---------------------|---------------------------|-------------------|
| 1                    | 0.0968         | 0.9258              | 0.8946                    | 0.8796            |
| 2                    | 0.0973         | 0.7868              | 0.7488                    | 0.7426            |
| 3                    | 0.0938         | 0.5800              | 0.5378                    | 0.5412            |
| 4                    | 0.0957         | 0.4609              | 0.4318                    | 0.4331            |
| 5                    | 0.0962         | 0.3149              | 0.3194                    | 0.3089            |
| 6                    | 0.0843         | 0.0817              | 0.1487                    | 0.1145            |

Table S4 Fitted ESR for six fluorescent cooling coatings in Figure 4d.

| Time  | BAM-2g | BAM-4g | BAM-6g | S541-2g | S541-4g | S541-6g |
|-------|--------|--------|--------|---------|---------|---------|
| 11:23 | 0.8835 | 0.8133 | 0.8002 | 0.8440  | 0.8440  | 0.8309  |
| 11:56 | 0.9052 | 0.8318 | 0.8202 | 0.8665  | 0.8704  | 0.8511  |
| 12:32 | 0.8842 | 0.8199 | 0.8123 | 0.8502  | 0.8539  | 0.8426  |
| 12:55 | 0.8920 | 0.8274 | 0.8202 | 0.8561  | 0.8597  | 0.8489  |
| 13:13 | 0.8998 | 0.8362 | 0.8100 | 0.8586  | 0.8736  | 0.8474  |
| 13:43 | 0.8958 | 0.8352 | 0.8069 | 0.8554  | 0.8635  | 0.8433  |
| 14:16 | 0.9148 | 0.8327 | 0.8154 | 0.8543  | 0.8673  | 0.8413  |
| 14:51 | 0.8964 | 0.8327 | 0.8284 | 0.8582  | 0.8624  | 0.8454  |
| 15:08 | 0.9198 | 0.8140 | 0.7973 | 0.8363  | 0.8418  | 0.8251  |



Table S5 Comparison of fluorescent pigments used in this work and previous study (Ref. 24).

| Phosphor                | BAM | S541 | SrAl <sub>2</sub> O <sub>4</sub> :Eu <sup>2+</sup> ,Dy <sup>3+</sup> ,Yb <sup>3+</sup><br>(Ref. 24) |
|-------------------------|-----|------|-----------------------------------------------------------------------------------------------------|
| Excitation peak (nm)    | 333 | 341  | 420                                                                                                 |
| Emission peak (nm)      | 463 | 539  | 525                                                                                                 |
| Stokes shift (nm)       | 130 | 198  | 105                                                                                                 |
| Quantum yield (%)       | 90  | 90   | 64                                                                                                  |
| Purcell factor          | 2.6 | 1.3  | 1.4                                                                                                 |
| Max ESR improvement (%) | 4   | -1%  | 3.6%                                                                                                |

References:

1. Peoples, J., Li, X., Lv, Y., Qiu, J., Huang, Z., & Ruan, X. (2019). A strategy of hierarchical particle sizes in nanoparticle composite for enhancing solar reflection. *International Journal of Heat and Mass Transfer*, 131, 487-494.
2. Yalçın, R. A., Blandre, E., Joulain, K., & Dré villon, J. (2020). Colored radiative cooling coatings with nanoparticles. *ACS Photonics*, 7(5), 1312-1322.
3. Fu, Y., An, Y., Xu, Y., Dai, J. G., & Lei, D. (2022). Polymer coating with gradient-dispersed dielectric nanoparticles for enhanced daytime radiative cooling. *EcoMat*, 4(2), e12169.
